# Supplementary material for: Vaccine hesitancy from parents and healthcare providers perspectives in Hadhramout Governorate, Yemen: a mixed-method study protocol
Source: PubMed Central journal article supplement — BMJ Open. 2022 Feb 17;12(2):e055841. doi: 10.1136/bmjopen-2021-055841 (PMC8860017; doi:10.1136/bmjopen-2021-055841), 2022-02-17
Supplement: bmjopen-2021-055841.draft_revisions.pdf [file bmjopen-2021-055841.draft_revisions.pdf]

# BMJ Open

BMJ Open is committed to open peer review. As part of this commitment we make the peer review history of every article we publish publicly available.

When an article is published we post the peer reviewers' comments and the authors' responses online. We also post the versions of the paper that were used during peer review. These are the versions that the peer review comments apply to.

The versions of the paper that follow are the versions that were submitted during the peer review process. They are not the versions of record or the final published versions. They should not be cited or distributed as the published version of this manuscript.

BMJ Open is an open access journal and the full, final, typeset and author-corrected version of record of the manuscript is available on our site with no access controls, subscription charges or pay-per-view fees (<http://bmjopen.bmj.com>).

If you have any questions on BMJ Open's open peer review process please email [info.bmjopen@bmj.com](mailto:info.bmjopen@bmj.com)

# BMJ Open

## Vaccine hesitancy from parents and healthcare providers perspectives in Hadhramout governorate, Yemen: a mixed-methods study protocol

|                               |                                                                                                                                                                                                                                                                                                                                                                               |
|-------------------------------|-------------------------------------------------------------------------------------------------------------------------------------------------------------------------------------------------------------------------------------------------------------------------------------------------------------------------------------------------------------------------------|
| Journal:                      | <i>BMJ Open</i>                                                                                                                                                                                                                                                                                                                                                               |
| Manuscript ID                 | bmjopen-2021-055841                                                                                                                                                                                                                                                                                                                                                           |
| Article Type:                 | Protocol                                                                                                                                                                                                                                                                                                                                                                      |
| Date Submitted by the Author: | 27-Jul-2021                                                                                                                                                                                                                                                                                                                                                                   |
| Complete List of Authors:     | SUTAN, ROSNAH BINTI; Universiti Kebangsaan Malaysia, community health<br>Batarfi, Suha; Hadhramout University College of Medicine and Health Sciences, Community Medicine department<br>Ismail, Halim; Universiti Kebangsaan Malaysia, community health<br>Bin-Ghouth, Abdulla ; Hadhramout University College of Medicine and Health Sciences, Community Medicine department |
| Keywords:                     | Public health < INFECTIOUS DISEASES, Community child health < PAEDIATRICS, Paediatric infectious disease & immunisation < PAEDIATRICS                                                                                                                                                                                                                                         |
|                               |                                                                                                                                                                                                                                                                                                                                                                               |

SCHOLARONE™  
Manuscripts

1  
2  
3 **Vaccine hesitancy from parents and healthcare providers perspectives in Hadhramout**  
4 **governorate, Yemen: a mixed-methods study protocol**  
5  
6  
7

8 Rosnah Sutan<sup>1</sup>, Suha Ali Batarfi<sup>1,2</sup>, Halim Ismail<sup>1</sup>, Abdulla Salem Bin-Ghouth<sup>2</sup>  
9

10 <sup>1</sup>Community Health Department, Medical Faculty, University Kebangsaan Malaysia  
11

12 <sup>2</sup> Department of Community Medicine, Hadharamout University College of Medicine and health  
13 sciences (HUCOM), Yemen  
14  
15

16  
17  
18  
19 **Correspondence author:**  
20

21 Suha Ali Batarfi  
22

23 Department of Community Medicine, Hadharamout University College of Medicine (HUCOM),  
24 Yemen  
25

26  
27 Email: batarfisuhaali@gmail.com  
28

29 Phone:+6011-27107155  
30  
31

32  
33  
34 Word Count (Abstract): 234  
35

36 Word Count: 3358  
37

38 Number of figures and tables: 2 figures, 3 tables  
39  
40  
41  
42  
43  
44  
45  
46  
47  
48  
49  
50  
51  
52  
53  
54  
55  
56  
57  
58  
59  
60

**ABSTRACT:**

**Introduction :** Although immunisation prevents the death of millions of infants and children each year, vaccination coverage of routine childhood vaccination does not reach its target. Reasons for low vaccination uptake can be related to both the demand and supply-side determinants. The prevalence of vaccine hesitancy is on the rise globally. However, scares data is known about vaccine hesitancy in low-income, Arabic countries. To address this issue in Yemen, as one of the Arabic low-income countries, we decided to address vaccine hesitancy link to child immunisation status among children living in Costal Hadhramout, Yemen, from parents perspectives and healthcare providers.

**Methods and analysis:** A mixed-methods research design will be used. The study will be conducted in Costal Hadhramout, Yemen. The study will be done through three phases. Phase one will be a situational analysis using secondary data from records of the national expanded program of immunisation in Costal Hadhramout to examine the trend for the last years. Phase two will be a quantitative study aiming to assess the prevalence of vaccination status of under two years of children and the determinants of parental vaccine hesitancy through a validated questionnaire. Finally, phase three will be a qualitative study using in-depth interviews and FGD for parents and health care providers to explore vaccine hesitancy in Yemen.

**Ethics and dissemination** The study has been approved by the Research Committee of the Faculty of Medicine, Universiti Kebangsaan Malaysia.

### STRENGTH AND LIMITATIONS OF THIS STUDY

- The strength of the present study protocol is its ability to determine all aspects of child, parental and healthcare factors of vaccine hesitancy among the Yemeni.
- Using the national data will help in the generalisation of the findings to Yemen.
- Applying the mixed method has an advantage in improving the grey area of socio-perspective, facilitators and barriers.
- The validated questionnaire used will determine better data quality.
- The inability to meet face to face during the current COVID 19 pandemic poses a limitation. Therefore, using telephone video calls or voice calls alone may not visualise the respondent expression and validity of the data captured.

## INTRODUCTION:

During the 20th century, there is a significant increase in life expectancy, attributed mainly to improvements in child survival. Universal child immunisation has been effectively used as a preventive measure to protect the vulnerable group. Immunisation has prevented millions of deaths related to vaccine-preventable diseases around the world<sup>1</sup>. From 2007 to 2010, global Diphtheria, Tetanus and Pertussis 3<sup>rd</sup> dose (DTP3) coverage was increased from 79% to 84%, but since 2010, the DTP3 coverage had noted plateauing. The coverage was varied by region, as in the WHO African Region, it is only 72%, while in the Western Pacific Region is 97%<sup>2</sup>

Reasons for low vaccination uptake are often not completely understood and seems to be multifactorial. Inadequate vaccination coverage can be related to both the demand and supply-side determinants. The majority of reasons for the low uptake of childhood vaccination in developing countries are related to lack of access to vaccination and family factors. Low education, literacy, and socio-economic status are well known indirectly contributed to non-achievable coverage. However, in several developing countries, the weakness of the health system is regarded as a significant barrier<sup>3,4</sup>. Persistent challenges seen related to acceptance of the services that affect the uptake, especially in developing countries<sup>5,6</sup>.

Vaccine hesitancy is a behavioural phenomenon among both; those who accept all vaccines with no doubt refuse all vaccines<sup>7,8</sup>. It is recognised as a growing problem of global importance that affects both developing and developed countries, and WHO defined it as delay in acceptance or refusal of vaccines despite availability of vaccine services<sup>9</sup>. Recently, vaccine hesitancy prevalence rises as a global problem and can be seen as poor childhood vaccination coverages. The World Health Organization (WHO) identified it as a priority issue and has developed a vaccine hesitancy model framework that emphasises confidence, complacency and convenience<sup>9</sup>. It was further expanded to included confidence, complacency, constraints, risk calculation, and collective responsibility and named these factors as psychological antecedents of vaccination<sup>10</sup>. These models are suggested based on research predominantly conducted in well developed and high-income countries<sup>11</sup>. Studies in neighbored Arab countries have addressed parental vaccine hesitancy as a concerning problem that likely influences the uptake of childhood vaccination<sup>12,13</sup>. However, till present, to the best of our knowledge, no published study address vaccine hesitancy in Yemen.

### Yemen's Issues and Challenges on Child Immunisation

Yemen is an Arabic, low-income country with poor socio-economic status and a fragile health system. It has a hard-geographic environment which affects access to essential basic services, and limited financial support cover cost a major challenge<sup>14</sup>. Since March 2015, Yemen

had been engaged in a civil war and has continued to date. Civil war and internal conflict affect Yemen's local development<sup>15,16</sup>. The instability, shortage of services and internal displacement may lead to limited vaccination coverage<sup>17</sup>. The Expanded Program of Immunisation (EPI) in Yemen was initiated in 1979 as a part of the Primary Health Care General Directorate in Public Health and Population. It aimed to prevent morbidity and mortality from preventable diseases through vaccination, and Infants and women of child-bearing age are the target groups<sup>18</sup>. Routine immunisation services in Yemen are given through fixed vaccination posts within the health facilities and outreach vaccinations strategy and based on the proximity of the target populations to the health facility. Table 1 showed the standard schedule of routine immunisation of the child of Yemen.

Table1: Standard schedule of routine immunisation of child of the Republic of Yemen

| Vaccine             | Age      |        |         |         |         |           |
|---------------------|----------|--------|---------|---------|---------|-----------|
|                     | At birth | 6weeks | 10weeks | 14weeks | 9months | 18 months |
| <b>BCG*</b>         | x        |        |         |         |         |           |
| <b>OPV*</b>         | x        | x      | x       | x       | x       | x         |
| <b>Pentavalent</b>  |          | x      | x       | x       |         |           |
| <b>Pneumococcal</b> |          | x      | x       | x       |         |           |
| <b>ROTA</b>         |          | x      | x       |         |         |           |
| <b>MR*</b>          |          |        |         |         | x       | x         |
| <b>IPV*</b>         |          |        |         | x       |         |           |

\*BCG: Bacille Calmette Guerin, OPV: Oral Polio Vaccine, MR: Measles, Rubella, IPV: inactivated poliovirus vaccine

According to the last Yemen National Health and Demographic Survey (YNHDS), in 2013, only 42.6% of children aged 12-23 months were fully vaccinated, while 16% did not receive any vaccination. No reported published data available for comparison on-trend. However, vaccines for significant vaccine-preventable diseases (VPDs) are available free for the public<sup>19</sup>. WHO and UNICEF reported vaccination coverage in 2018 for Yemen was 65% based on DTP3, which still below 90% that every country should reach by 2020<sup>20</sup>. From the previous studies done in Yemen, we can conclude that even before the war, the vaccination coverage in Yemen was not achieving

1  
2  
3 the acceptable target, and the children's percentage that was not vaccinated at all was increased.  
4 In addition, various Governorate of Yemen reported unvaccinated or partially vaccinated children  
5 mainly due to lack of information and parental motivation<sup>18 21-23</sup>.  
6  
7  
8  
9

### 10 **The rationale for this research**

11 Although vaccine hesitancy is addressed extensively in literature in the past few years, few  
12 studies explore this issue in low-income countries. Thus, most finding and model developed was  
13 based on studies done in high-income countries<sup>11</sup>. Limited studies addressed the issue of  
14 childhood vaccination in Yemen, and most studies focused on coverage and reasons for non-  
15 vaccination<sup>17,18,22,23</sup>. Only one study addressed the determinants of complete vaccination<sup>21</sup>,  
16 although that study did not address the issue of vaccine hesitancy. Furthermore, all published  
17 studies addressing childhood vaccination in Yemen used a quantitative method, which cannot  
18 give in-depth details about the problem when integrating with available qualitative study findings.  
19 In addition, all community-based studies done in Yemen explored the problem from the parents'  
20 perspective only and did not consider the healthcare workers who can give a broad picture of the  
21 problem.  
22  
23  
24  
25  
26  
27  
28  
29

30  
31 Studying the perspective of parents and healthcare workers on vaccine hesitancy toward  
32 childhood vaccination is vital in improving service delivery and vaccine uptake. In addition, it helps  
33 to reduce the high morbidity and mortality rate among children from vaccine-preventable  
34 diseases, which is known to be the leading cause of under-five mortality. Therefore, it is crucial  
35 to understand their perceptions as they play a vital role in vaccination programs. Also, explore  
36 their perspectives are informative in understanding the barriers faced by them. So, to add  
37 knowledge in literature gaps about vaccine hesitancy and childhood vaccination in Yemen, the  
38 present study protocol is designed as a mixed-method study to assess the vaccine hesitancy  
39 determinants from the perspective of parents and healthcare workers. A conceptual framework  
40 (Figure 1) illustrated the concept of the present study to overcome the gap of evidence in the  
41 literature, which must be explored.  
42  
43  
44  
45  
46  
47  
48  
49

### 50 **Aims and objectives:**

51  
52 This research aims to address the vaccine hesitancy issue and the child immunisation status  
53 among children living in Costal Hadhramout, Yemen, from the perspectives of parents and  
54 healthcare providers. The specific objectives of our research are:  
55  
56  
57  
58  
59  
60



- 1
- 2
- 3 1. To conduct a situational analysis of the routine childhood immunisation EPI data in Costal
- 4 Hadhramout, Hadhramout Governorate, Yemen.
- 5
- 6
- 7 2. To measure the prevalence of vaccine hesitancy and child immunisation status among
- 8 children and their mothers living in Costal Hadhramout, Hadhramout Governorate, Yemen.
- 9
- 10
- 11 3. To identify the factors associated with and predict vaccine hesitancy and immunisation status
- 12 of children living in Costal Hadhramout, Yemen.
- 13
- 14
- 15 4. To explore mothers' reasons for hesitancy towards childhood vaccination.
- 16
- 17 5. To explore barriers in achieving immunisation coverage among the healthcare providers in
- 18 Costal Hadhramout, Yemen.
- 19

## 20 **METHODS**

21  
22  
23 The present study used a complementary explanatory sequential mixed-method study design.  
24 The study will take place at the Hadhramout in Yemen, consisting of 30 districts and occupying  
25 vast areas of the Arabian Sea coast. Hadhramout has divided administratively into two parts: the  
26 valley\ desert (Wadi Hadhramout) and the Coastal Hadhramout. Coastal Hadhramout overlooking  
27 the south to the Arabian Sea, possesses a coastline length of about 120 kilometres. It is estimated  
28 that the total population of coastal Hadhramout in 2018 was 893502 people, and the population  
29 grows at a rate of 3.08% annually. The research targets the twelve districts of coastal  
30 Hadhramout<sup>24</sup>. This study consisted of three phases: Phase1: Situation analysis, Phase 2:  
31 Quantitative study and Phase 3: Qualitative study. An overview of the study phases and their flow  
32 is illustrated in figure 2.  
33  
34  
35  
36  
37  
38

### 39 **Phase 1: situation analysis**

40  
41 This part of our study will be a retrospective descriptive study. Records from the national  
42 immunisation program for all 12 districts in coastal Hadhramout for the past ten years (from  
43 January 2011 to December 2020) will be reviewed and analysed (secondary data analysis). After  
44 taking permission from the general manager of the Health and Population Affairs Office - Coastal  
45 Hadhramout, data will be extracted from data collected in the Department of EPI in Health and  
46 Population Affairs Office – Costal Hadhramout. First, we will assess the immunisation coverage  
47 rate (which estimated for each vaccine and, for multi-dose vaccines, for each dose received (e.g.,  
48 diphtheria-tetanus-pertussis-containing vaccine (DTPCV1, DTPCV2, DTPCV3) in each year  
49 (trend analysis which is the first outcome of this phase). Also, the districts will be classified into  
50 good or low coverage districts. The classification will be dependent on the Global Immunisation  
51  
52  
53  
54  
55  
56  
57  
58  
59  
60

1  
2  
3 Vision and Strategy goal, which is at least 90% national vaccination coverage and at least 80%  
4 vaccination coverage in every district or equivalent administrative unit. So each district that has  
5 coverage of 80% or above will be good, and any district that has below 80% will be considered a  
6 low coverage district (WHO, 2015). This classification is considered the second outcome of this  
7 phase and will be used to select districts in phase 2.  
8  
9  
10

## 11 **Phase 2: a quantitative study**

12  
13  
14 In this phase, a community based, cross-sectional study design will be used. The study population  
15 in this study will be mothers or caretakers of children living in coastal Hadhramout, Hadhramout  
16 Governorate, Yemen 2021, and aged less than two years. The stratified cluster sampling method  
17 incorporated a combination of stratified and cluster sampling methods will be used in this study.  
18 First, the 12 districts in Coastal- Hadhramout will be stratified by immunisation coverage level as  
19 good or low coverage districts depended on Phase 1. Two districts will be selected randomly from  
20 each stratum. Second, a 30 cluster (approximately estimated by the researcher and maybe more  
21 according to the absolute number of houses in each cluster) will be chosen from the selected  
22 districts proportionally to the size. Then all households in those clusters will be surveyed for an  
23 eligible child.  
24  
25  
26  
27  
28  
29

30  
31 The researcher will prepare the sampling frame used in this study after consultation with  
32 the director-general of the expanded immunisation program in Coastal Hadhramout. Moreover,  
33 The preparation of this sampling frame will be based on the list of household distribution used in  
34 the last National Immunisation Days (NIDs). Based on this list, the clusters in each district will be  
35 identified (approximately every cluster contains 20 to 30 households). Then, the researcher will  
36 select the number of clusters that need to cover the sample size in this study from each district  
37 proportionally. In this study, an eligible mother or caretaker will be a mother who has a child aged  
38 less than two years. The youngest child will be taken for mothers with more than one child aged  
39 less than two years. We will exclude the Non-Yemeni family.  
40  
41  
42  
43  
44

45  
46 The sample size for this phase is calculated based on the formula of estimating proportion  
47 (prevalence) using the Kish formula<sup>25</sup> and comparing two proportions using Fleiss formula<sup>26</sup> with  
48 a confidence interval of 95% and power of study 0.80. The largest sample size from using both  
49 formulae is 767, so this will be our sample size for this phase. Data will be collected from households  
50 in selected clusters by the researcher and researcher assistants (health workers). Four health workers will  
51 be trained to collect data from mothers, and during fieldwork, each health worker will be a team. Each team  
52 will be supervised in the field by the researcher or fieldwork supervisor. Respondents will be interviewed  
53  
54  
55  
56  
57  
58  
59  
60

1  
2  
3 using a structured pretested designed questionnaire after being informed about the purpose of the study  
4 and after giving their agreement to take part in the study.  
5

6 The questionnaire will be adopted and adapted to the Yemeni population, and validation will be  
7 conducted. The questionnaire will cover the following domain: domain1: child-related characteristics, e.g.  
8 age, sex, birth order, place and type of delivery, gestational age at delivery and health status of the child.  
9 Domain 2: family-related characteristics, e.g. age, education, work, monthly income, residency and number  
10 of people living in the family. Domain 3: immunisation related knowledge. Domain 4: hesitancy. Domain 5:  
11 psychological antecedents of vaccination (confidence, complacency, constraints, calculation and collective  
12 responsibility). Domain 6: vaccination status of the child (fully, partial or unvaccinated): based on the child's  
13 immunisation card, the history of immunisation provided by the mothers. Domain 7: availability and  
14 accessibility to vaccination service. Domain 8: Reasons for the incomplete or unvaccinated child. The  
15 operational definition of the study variables is listed in Table2.  
16  
17  
18  
19

20 In this study, the primary dependent variable is the mother's hesitancy level which will be  
21 assessed using an Arabic version of the Parent Attitudes about Childhood Vaccines questionnaire  
22 (PACV) after permission from the author granted (Alsuwaidi et al. 2020; Opel et al. 2011). This  
23 questionnaire is divided into three domains: the first about behaviour, the second about safety  
24 and efficacy, and the third about general attitude and trust. Furthermore, under these domains,  
25 fifteen items are grouped. A numeric score is used in this PACV, as items answered with a  
26 hesitant response are given a score of 2, items answered with a response of do not know or not  
27 sure given a score of 1, and items answered with a non-hesitant response are scored as 0. The  
28 raw score is then converted to a score range from 0 to 100. Accordingly, parents are assigned as  
29 1 to indicate a hesitant score value  $\geq$  of 50 or 0 as a non-hesitant parent with a score  $<$ 50.  
30  
31  
32  
33  
34  
35  
36

37 The second dependent variable in this study is the immunisation (vaccination) status of  
38 children aged 12-23 months. The immunisation status can be completed (Fully) immunised, and  
39 incomplete immunised or unimmunised. The definition of those classifications is according to the  
40 Yemeni EPI schedule: Complete (Fully) immunised: A child aged 12-23 months who received one  
41 BCG, at least three doses of pentavalent, at least three pneumococcal, at least three doses of  
42 OPV, two doses Rotavirus vaccine and one dose MR (Measles Rubella) vaccine. Incomplete  
43 immunised: A child who did not receive all the routine EPI vaccines before his/her first birthday.  
44 Unimmunized (unvaccinated): A child did not receive any thirteen doses of recommended  
45 vaccines (Al-Tarbi& Bin Ghout 2020).  
46  
47  
48  
49  
50

51 The Independent Variables in our study will include child and family characteristics:age, sex, birth  
52 order, place and type of delivery, gestational age at delivery and health status of the child, parents  
53 age, education, work, monthly income, residency and number of people living in the family.  
54  
55  
56  
57  
58  
59

1  
2  
3 Immunisation-related knowledge: this variable will be assessed using a scale adapted from a  
4 previous study done in Yemen<sup>21</sup>. Psychological antecedents of vaccination: confidence,  
5 complacency, constraints, calculation and collective responsibility. Those variables will be  
6 measured using the 5C scale<sup>10</sup>. To the best of our knowledge, there is no Arabic version of the  
7 5C scale, so, according to the sample study protocol, the translation and validation of the 5C scale  
8 proposed by Betsch et al.<sup>27</sup> will be done. Availability and accessibility to vaccination service: this  
9 will be assessed using four questions adapted from previous literature. Permission from the  
10 authors of all mentioned scales will be adapted to suit the local population.  
11  
12

13  
14  
15  
16 The questionnaire's validity and reliability will be assessed. The univariate analysis  
17 describes frequencies and percentages. Bivariate analyses will assess the associations between  
18 dependent and independent variables. A p-value of less than 0.05 was set up as a determinant  
19 for the significant variable. Multiple logistic regression will be used to assess the effect of different  
20 variables on hesitancy and children's immunisation status. The study results will be presented as  
21 tables and graphs.  
22  
23  
24  
25  
26  
27

### 28 **Phase 3: a qualitative study**

29  
30 The case study design will be conducted in coastal Hadhramout, Yemen. The study population of  
31 this phase will be mothers\ caretakers who participate in phase 2 and are identified as hesitant  
32 mothers, and health care providers and health leaders who involve in the immunisation program  
33 in coastal Hadhramout, Hadhramout Governorate, Yemen. The purposive sampling method will  
34 be used in this phase. Mothers/caretakers will be selected from those who participated in phase  
35 2 and showed good cooperation. Health care providers and leaders will be selected from the  
36 health facilities that provide immunisation in the selected cluster area in phase 2.  
37  
38  
39  
40  
41

42 For this part of the study, data will be collected through In-depth interviews for mothers/  
43 caretakers. In contrast, Focus Group Discussions (FGD) will collect data from health care  
44 providers and health leaders. First, in-depth interviews for mothers/ caretakers and FGD for health  
45 care providers and health leaders will be done until saturation is reached after triangulation. Then,  
46 the thematic analysis will be done to analyse the contents of In-depth interviews and FGD. The  
47 key questions are listed in Table 3.  
48  
49  
50  
51  
52  
53  
54  
55  
56  
57  
58  
59  
60

## Patient and public involvement

Participants in the study, parents and healthcare providers, can be involved in the study's design mainly in phase 2. In this phase, Study tools will be piloted and tested by a research team that needs contribution from the parents and health providers. Also, in phase 3, participants will give the chance to state any additional comments during the interview and FGD; therefore, their priorities, experiences and perception can be considered.

## ETHICS AND DISSEMINATION:

The study proposal was reviewed and approved by the Research Ethics Committee of Faculty of Medicine, Universiti Kebangsaan Malaysia, project code: FF-2021-051. Permission was obtained from the health affairs office – Costal Hadhramout, Hadhraumout governorate to conduct the research. A simple and clear explanation of the study's aim and procedure will be provided to participants involved in the study. Consents will be obtained from all participants taking part in this study. Risks to participants or researchers involved in this study are unexpected. The privacy and confidentiality of participants will be assured. Study findings will be communicated through publication in peer-reviewed academic journals and disseminated to healthcare professionals, stakeholders, researchers and the public through academic conferences and public presentations.

Table 2 List of Independent Variables and their definition in this study

| Independent variables             | Definition and analysis                                                                                                                                                                     |
|-----------------------------------|---------------------------------------------------------------------------------------------------------------------------------------------------------------------------------------------|
| <b>I. Child-related variables</b> |                                                                                                                                                                                             |
| Age                               | Age of child in months, at time of data collection, obtained from the child's birth certificate, child's immunisation card or by asking mother /caretaker. Mean with Sd will be calculated. |
| Gender                            | boy or girl                                                                                                                                                                                 |
| Birth order                       | Position of the child among his or her siblings. categorised to: 1 <sup>st</sup> born, 2–3, 4–5 and $\geq 6$ <sup>28</sup>                                                                  |
| Place of delivery                 | The place of delivery of the child is either delivered at a health facility or home <sup>28 29</sup>                                                                                        |
| Type of delivery                  | The type of delivery, either vaginal or cesarean delivery <sup>21</sup>                                                                                                                     |
| Gestational age at delivery       | Referred to either the child full-term or premature                                                                                                                                         |
| Health status of the child        | Referred to either the child well or has a medical problem.                                                                                                                                 |

| <b>ii. Family-related variables</b>                                                                                      |                                                                                                                                                                                                                                                                                                                                                                                                                                                                                                                                                                                                                                                                                                                                                                                                                                                                                                        |
|--------------------------------------------------------------------------------------------------------------------------|--------------------------------------------------------------------------------------------------------------------------------------------------------------------------------------------------------------------------------------------------------------------------------------------------------------------------------------------------------------------------------------------------------------------------------------------------------------------------------------------------------------------------------------------------------------------------------------------------------------------------------------------------------------------------------------------------------------------------------------------------------------------------------------------------------------------------------------------------------------------------------------------------------|
| Mother's age (years)                                                                                                     | age of the mother in years at the time of data collection. Mean with Sd will be calculated.                                                                                                                                                                                                                                                                                                                                                                                                                                                                                                                                                                                                                                                                                                                                                                                                            |
| Age at first birth (years)                                                                                               | Mother's age when she births her first child. Mean with Sd will be calculated.                                                                                                                                                                                                                                                                                                                                                                                                                                                                                                                                                                                                                                                                                                                                                                                                                         |
| Mother's Marital status                                                                                                  | The mother's current marital status is either married or currently unmarried (divorced or widowed) <sup>21</sup>                                                                                                                                                                                                                                                                                                                                                                                                                                                                                                                                                                                                                                                                                                                                                                                       |
| Mother's educational level                                                                                               | The mother gained the highest formal education. categorised as either illiterate, able to read and write, Essential education, Secondary education or university and above <sup>30</sup>                                                                                                                                                                                                                                                                                                                                                                                                                                                                                                                                                                                                                                                                                                               |
| Occupation of mother                                                                                                     | The mother's working status categorised as either employed or housewife <sup>31</sup>                                                                                                                                                                                                                                                                                                                                                                                                                                                                                                                                                                                                                                                                                                                                                                                                                  |
| Father's educational level                                                                                               | My father's highest formal educations were categorised as either illiterate, read and write, Essential education, Secondary education, or university and above.                                                                                                                                                                                                                                                                                                                                                                                                                                                                                                                                                                                                                                                                                                                                        |
| Father's occupation                                                                                                      | Father's type of work categorised as either government employee, daily labourer, merchant unemployed or others.                                                                                                                                                                                                                                                                                                                                                                                                                                                                                                                                                                                                                                                                                                                                                                                        |
| Family size                                                                                                              | The total number of persons in the household. this variable then will be categorised to:<br>0= ≤4, 1= 5–9 , 2= ≥10 <sup>32</sup>                                                                                                                                                                                                                                                                                                                                                                                                                                                                                                                                                                                                                                                                                                                                                                       |
| Family residency                                                                                                         | Permanent place of residence of the child's family categorised as urban or rural <sup>21 33</sup>                                                                                                                                                                                                                                                                                                                                                                                                                                                                                                                                                                                                                                                                                                                                                                                                      |
| Monthly family income                                                                                                    | Average total income per month in Yemeni Riyals YR (1 US \$ = 600 YR). Mean with Standard deviation will be calculated.                                                                                                                                                                                                                                                                                                                                                                                                                                                                                                                                                                                                                                                                                                                                                                                |
| <b>III. Mother's / caretaker's immunisation related knowledge</b>                                                        |                                                                                                                                                                                                                                                                                                                                                                                                                                                                                                                                                                                                                                                                                                                                                                                                                                                                                                        |
| Source of information                                                                                                    | The source that the participant hears from is about vaccination and vaccine-preventable disease. It categorised to:<br>0= Radio, 1= TV, 2= internet, 3= friends, 4= schools, 5= Health personnel, 6= others.                                                                                                                                                                                                                                                                                                                                                                                                                                                                                                                                                                                                                                                                                           |
| immunisation related knowledge                                                                                           | Mother's knowledge regarding preventable diseases by immunisation, the best way of protection from vaccine-preventable diseases, causes and number of vaccine doses, and the time of vaccine administration was assessed through five groups of questions containing 38 items. Each item was scored as 1: correct, 0: wrong, or know the answer.<br><br>the scale was adopted from the previous study done in Yemen after taken permission from the author <sup>21</sup><br><br>Analysis: Calculation of the total knowledge score was made by summation of the participant's responses, which ranged between 0 - 38 and was classified into 0 and 1 as follows:<br>0= For poor knowledge, range from 0 – 19, representing ≤ 50% of the maximum point in the score range.<br>1= For good knowledge, which ranges from 20 – 38, representing >50% of the maximum point in the score range <sup>21</sup> |
| <b>V. physiological antecedents of vaccination: those variables will be measured by using the 5C scale <sup>10</sup></b> |                                                                                                                                                                                                                                                                                                                                                                                                                                                                                                                                                                                                                                                                                                                                                                                                                                                                                                        |
| Confidence                                                                                                               | This factor will be assessed through 3 items from The 5C scale: "1- I am completely confident that vaccines are safe. 2- Vaccinations are effective. 3- Regarding vaccines, I am confident that public authorities decide in the best interest of the community".<br>Each item was scored on seven points Likert scale ((1=strongly disagree, 2=moderately disagree, 3=slightly disagree, 4=neutral (or: neither disagree nor agree), 5=slightly agree, 6=moderately agree, 7=strongly agree).<br>Analysis: The mean score will be calculated by summing the respondent's responses for the three items and divided by 3 <sup>10</sup>                                                                                                                                                                                                                                                                 |
| Complacency                                                                                                              | This factor will be assessed through 3 items from The 5C scale: "1- Vaccination is unnecessary because vaccine-preventable diseases are not common anymore. 2- My immune system is strong, and it also protects me against diseases. 3- Vaccine-preventable diseases are not so severe that I should be vaccinated".<br>Each item was scored on seven points Likert scale same as described in the confidence variable.<br>Analysis: The mean score will be calculated by summing the respondent's responses to the three items and divided by 3 <sup>10</sup>                                                                                                                                                                                                                                                                                                                                         |

|                                          |                                                                                                                                                                                                                                                                                                                                                                                                                                                                                                                                                                            |
|------------------------------------------|----------------------------------------------------------------------------------------------------------------------------------------------------------------------------------------------------------------------------------------------------------------------------------------------------------------------------------------------------------------------------------------------------------------------------------------------------------------------------------------------------------------------------------------------------------------------------|
| Constraints                              | This factor assessed through 3 items from The 5C scale: "1- Everyday stress prevents me from being vaccinated. 2- For me, it is inconvenient to be vaccinated. 3- Visiting the doctor makes me feel uncomfortable; this keeps me from being vaccinated".<br>Each item was scored on seven points Likert scale same as described in the confidence variable.<br>Analysis: The mean score will be calculated by summing the respondent's responses to the three items and divided by 3 <sup>10</sup> .                                                                       |
| Calculation                              | This factor assessed through 3 items from The 5C scale: "1- When I think about being vaccinated, I weigh its benefits and risks to make the best decision possible. 2- For every vaccination, I closely consider whether it is useful for me. 3- I need to understand the topic of vaccination before I get vaccinated fully".<br>Each item was scored on seven points Likert scale same as described in the confidence variable.<br>Analysis: The mean score will be calculated by summing the respondent's responses to the three items and divided by 3 <sup>10</sup> . |
| Collective responsibility                | This factor assessed through 3 items from The 5C scale: "1- When everyone else is vaccinated, I do not have to be vaccinated, too. 2- I get vaccinated because I can also protect people with a weaker immune system. 3- Vaccination is a collective action to prevent the spread of diseases".<br>Each item was scored on seven points Likert scale same as described in the confidence variable.<br>Analysis: The mean score will be calculated by summing the respondent's responses to the three items and divided by 3 <sup>10</sup> .                                |
| <b>VI. Access to vaccination service</b> |                                                                                                                                                                                                                                                                                                                                                                                                                                                                                                                                                                            |
| Distance                                 | Referred to time take to reach the nearest health facility. this variable categorised to:<br>0 = ≤ 30 min, 1= > 30 min.                                                                                                                                                                                                                                                                                                                                                                                                                                                    |
| ways to reach the health facility        | They referred to how parents can reach to health facility either by walk or use transport.                                                                                                                                                                                                                                                                                                                                                                                                                                                                                 |
| Availability of vaccine or vaccinator    | Referred to was the vaccines and vaccinator are available in the health facility or not.                                                                                                                                                                                                                                                                                                                                                                                                                                                                                   |
| Time waiting                             | Referred to was the parents wait for a long time to get the vaccination for their child.                                                                                                                                                                                                                                                                                                                                                                                                                                                                                   |

Table3: critical questions for the qualitative phase

| <b>A- The key question for an in-depth interview with mothers:</b>                                                                                                                                                                 | <b>B- The critical question for FGD with healthcare providers and leaders:</b>                                                                                                                                                                    |
|------------------------------------------------------------------------------------------------------------------------------------------------------------------------------------------------------------------------------------|---------------------------------------------------------------------------------------------------------------------------------------------------------------------------------------------------------------------------------------------------|
| Why parents refuse or incomplete vaccination for their children?<br>- socio-economic reason<br>- culture and religious reasons<br>- parental vaccination knowledge reasons<br>- services access reasons<br>- staff-related reasons | What are the barriers to achieving immunisation coverage?<br>- staff knowledge barriers<br>- staff communication skills barriers<br>- staff training and competency barriers<br>- staff numbers barriers<br>- supply and infrastructure barriers. |

**Figure legend/caption:**

Figure 1: Conceptual Framework

Figure2: An overview of the study phases

**Author Contributions**

RS and SB designed the study protocol and wrote the manuscript. All authors proofread the final manuscript before submission.

1  
2  
3 **Patient consent for publication** Not required.  
4

5 **Funding** This research received no specific grant from any funding agency in public,  
6 commercial or not-for-profit sectors.  
7

8  
9 **Competing interests** None declared.  
10

11 **Provenance and peer review** Not commissioned; externally peer-reviewed.  
12

13 **Data sharing statement** No additional data available.  
14

15  
16 **ORCID iDs:**

17  
18 Rosnah Sutan: <https://orcid.org/0000-0001-9956-4727>

19  
20 Suha Ali Batarfi: <https://orcid.org/0000-0003-0060-5694>  
21

22 **REFERENCES:**

- 23  
24 1. World Health Organization. World Health Organization vaccination coverage cluster surveys:  
25 reference manual: Geneva: World Health Organization, 2018a.  
26 2. VanderEnde K, Gacic-Dobo M, Diallo MS, et al. Global Routine Vaccination Coverage—2017. *Morbidity*  
27 *and Mortality Weekly Report* 2018;67(45):1261.  
28 3. Smith LE, Amlot R, Weinman J, et al. A systematic review of factors affecting vaccine uptake in young  
29 children. *Vaccine* 2017;35(45):6059-69. doi: 10.1016/j.vaccine.2017.09.046  
30 4. Larson HJ. The biggest pandemic risk? Viral misinformation. *Nature* 2018;562(7726):309-10.  
31 5. Cooper S, Okeibunor JC, Wiyeh A, et al. Knowledge advances and gaps on the demand side of  
32 vaccination. *The Lancet Infectious Diseases* 2019;19(1):13-15.  
33 6. World Health Organization. 2017 Assessment report of the global vaccine action plan: Strategic  
34 Advisory Group of Experts on Immunisation. Geneva: World Health Organization., 2017.  
35 7. Macdonald N. Vaccine hesitancy: Definition, scope and determinants. *Vaccine* 2015;32(34) doi:  
36 10.1016/j.vaccine.2015.04.036  
37 8. Domek GJ, O'Leary ST, Bull S, et al. Measuring vaccine hesitancy: Field testing the WHO SAGE Working  
38 Group on Vaccine Hesitancy survey tool in Guatemala. *Vaccine* 2018;36(35):5273-81. doi:  
39 <https://doi.org/10.1016/j.vaccine.2018.07.046>  
40 9. The SAGE Vaccine Hesitancy Working Group. Report of the SAGE working group on vaccine hesitancy.  
41 Geneva, Switzerland: World Health Organization, 2014.  
42 10. Betsch C, Schmid P, Heinemeier D, et al. Beyond confidence: Development of a measure assessing  
43 the 5C psychological antecedents of vaccination. *PLoS One* 2018;13:e0208601. doi:  
44 10.1371/journal.pone.0208601  
45 11. Cooper S, Betsch C, Sambala EZ, et al. Vaccine hesitancy—a potential threat to the achievements of  
46 vaccination programmes in Africa. *Human Vaccines Immunother* 2018;14(10):2355-57.  
47 12. Alsuwaidi AR, Elbarazi I, Al-Hamad S, et al. Vaccine hesitancy and its determinants among Arab  
48 parents: a cross-sectional survey in the United Arab Emirates. *Human Vaccines Immunother*  
49 2020:1-7.  
50 13. Alsubaie SS, Gosadi IM, Alsaadi BM, et al. Vaccine hesitancy among Saudi parents and its  
51 determinants. *Saudi Med J* 2019;40(12):1242-50.  
52  
53  
54  
55  
56  
57  
58  
59  
60



14. El Bcheraoui C, Jumaan AO, Collison ML, et al. Health in Yemen: losing ground in wartime. *globalisation and health* 2018;14(1):42.
15. Boley J, Kent E, Grassie S, et al. A conflict overlooked: Yemen in crisis, 2017.
16. OCHA-Yemen. 2019 Humanitarian needs overview Yemen: United Nations Office for the Coordination of Humanitarian Affairs, 2018.
17. Torbosh A, Al Amad MA, Al Serouri A, et al. The Impact of War in Yemen on Immunization Coverage of Children Under One Year of Age: Descriptive Study. *JMIR public health surveillance* 2019;5(4):e14461. doi: DOI: 10.2196/14461
18. Ba'amer A. Coverage of and barriers to routine child vaccination in Mukalla district, Hadramout governorate, Yemen. *EMHJ-Eastern Mediterranean Health Journal* 2010;16(2): 223-27.
19. Ministry of Public Health Population, Central Statistical Organization. Yemen national health and demographic survey 2013: MOPHP, CSO, PAPFAM, and ICF International Rockville, Maryland, USA, 2015.
20. Peck M, Gacic-Dobo M, Diallo MS, et al. Global routine vaccination coverage, 2018/Couverture de la vaccination systematic dans le monde, 2018. *Weekly Epidemiological Record* 2019;94(43):498-505.
21. Basaleem HO, Al-Sakkaf KA, Shamsuddin K. Immunization coverage and its determinants among children 12-23 months of age in Aden, Yemen. *Saudi Med J* 2010;31(11):1221-6.
22. Al-Tarbi AM, Bin Ghout AS. Vaccination Coverage in Tarim District, Yemen, 2017 *American Journal of Epidemiology & Public Health* 2020;4(1):10-15.
23. Al-Rabeei NA, Dallak AM, Al-Fosail AA. Immunisation coverage among children in Al-Taizyah district, Taiz governorate, Yemen. *Indian Journal of Community Health* 2014;26(4):343-48.
24. Health Affairs Office Hadhramout Governorate. The statistical report for the year 2018 of the health office in Hadhramaut Governorate. Yemen: Republic of Yemen Ministry of Health & Population: Health Affairs Office Hadhramout Governorate, 2018:26.
25. Kish L. Survey sampling. New York: John Wiley and Sons 1965.
26. Fleiss JL. Statistical Methods for Rates and Proportions. New York: John Wiley and Sons 1981.
27. Betsch C, Habersaat KB, Deshevoi S, et al. Sample study protocol for adapting and translating the 5C scale to assess the psychological antecedents of vaccination. *BMJ Open* 2020;10(3):e034869.
28. Efendi F, Pradiptasiwi DR, Krisnana I, et al. Factors associated with complete immunisation coverage among Indonesian children aged 12–23 months. *Children and Youth Services Review* 2020;108:104651. doi: <https://doi.org/10.1016/j.chilyouth.2019.104651>
29. Mbengue MAS, Sarr M, Faye A, et al. Determinants of complete immunisation among Senegalese children aged 12-23 months: evidence from the demographic and health survey. *Bmc Public Health* 2017;17:9. doi: 10.1186/s12889-017-4493-3
30. Asif AM, Akbar M, Tahir MR, et al. Role of Maternal Education and Vaccination Coverage: Evidence From Pakistan Demographic and Health Survey. *Asia-Pac J Public Health* 2019;31(8):679-88. doi: 10.1177/1010539519889765
31. Jama AA. Determinants of Complete immunisation Coverage among Children Aged 11-24 Months in Somalia. *Int J Pediatr* 2020;2020:7. doi: 10.1155/2020/5827074
32. Herliana P, Douiri A. Determinants of immunisation coverage of children aged 12-59 months in Indonesia: a cross-sectional study. *BMJ Open* 2017;7(12):14. doi: 10.1136/BMJ open-2016-015790
33. Geweniger A, Abbas KM. Childhood vaccination coverage and equity impact in Ethiopia by socio-economic, geographic, maternal, and child characteristics. *Vaccine* 2020;38(20):3627-38. doi: 10.1016/j.vaccine.2020.03.040

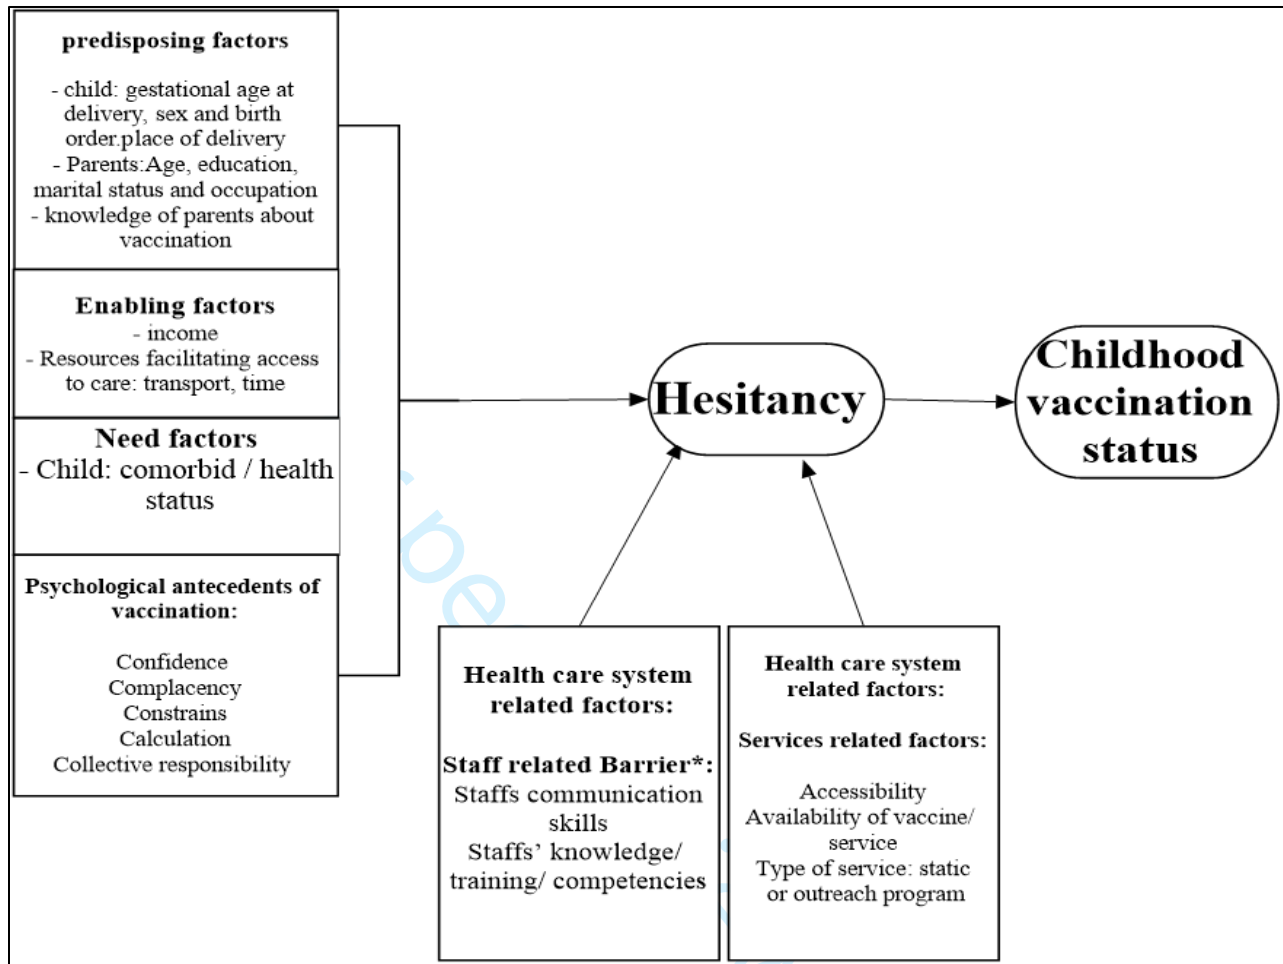

Figure 1: Conceptual Framework

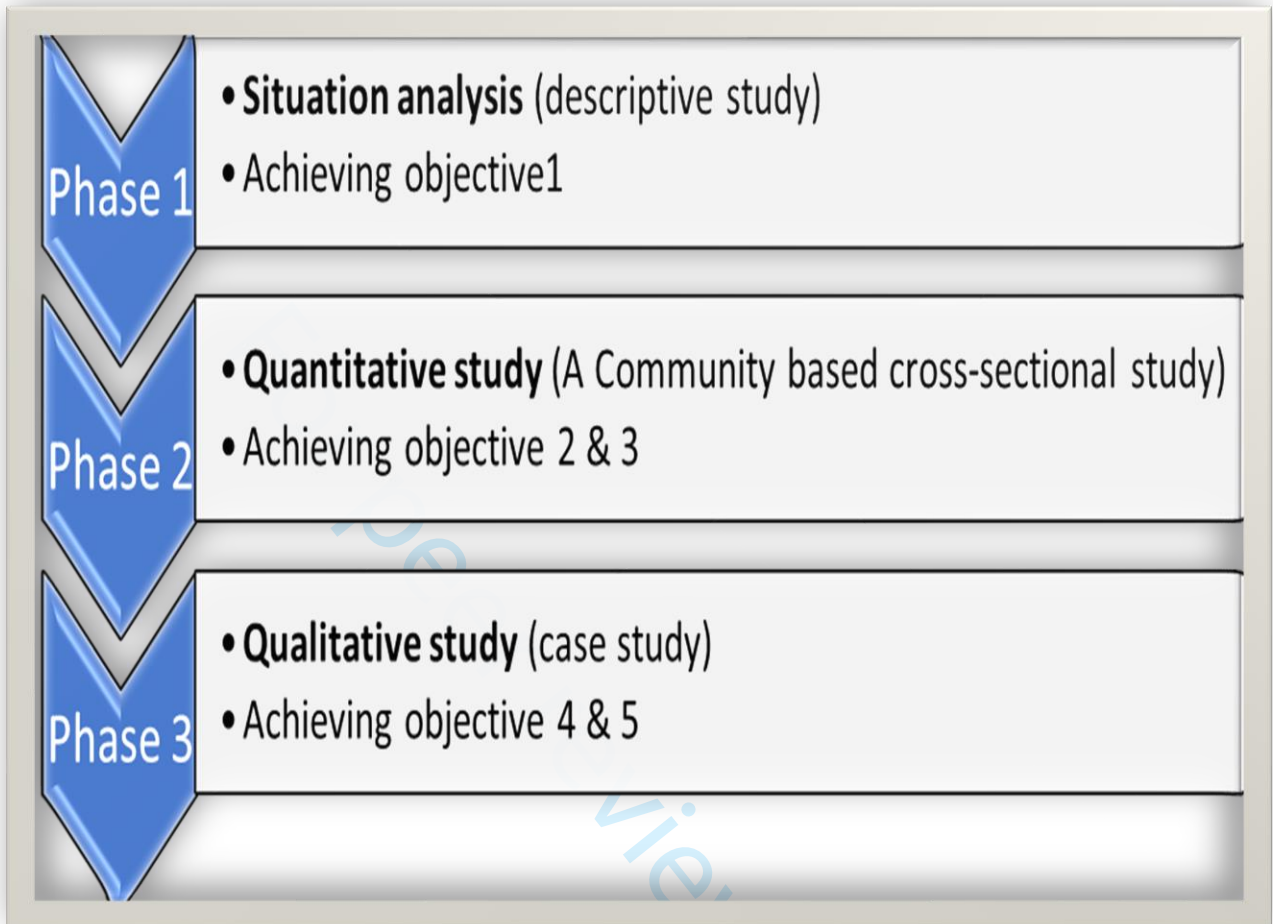

**Figure2: An Overview of the Study Phases**

# BMJ Open

## Vaccine hesitancy from parents and healthcare providers perspectives in Hadhramout governorate, Yemen: a mixed-methods study protocol

|                                 |                                                                                                                                                                                                                                                                                                                                                                               |
|---------------------------------|-------------------------------------------------------------------------------------------------------------------------------------------------------------------------------------------------------------------------------------------------------------------------------------------------------------------------------------------------------------------------------|
| Journal:                        | <i>BMJ Open</i>                                                                                                                                                                                                                                                                                                                                                               |
| Manuscript ID                   | bmjopen-2021-055841.R1                                                                                                                                                                                                                                                                                                                                                        |
| Article Type:                   | Protocol                                                                                                                                                                                                                                                                                                                                                                      |
| Date Submitted by the Author:   | 15-Jan-2022                                                                                                                                                                                                                                                                                                                                                                   |
| Complete List of Authors:       | SUTAN, ROSNAH BINTI; Universiti Kebangsaan Malaysia, community health<br>Batarfi, Suha; Hadhramout University College of Medicine and Health Sciences, Community Medicine department<br>Ismail, Halim; Universiti Kebangsaan Malaysia, community health<br>Bin-Ghouth, Abdulla ; Hadhramout University College of Medicine and Health Sciences, Community Medicine department |
| <b>Primary Subject Heading</b>: | Public health                                                                                                                                                                                                                                                                                                                                                                 |
| Secondary Subject Heading:      | Epidemiology                                                                                                                                                                                                                                                                                                                                                                  |
| Keywords:                       | Public health < INFECTIOUS DISEASES, Community child health < PAEDIATRICS, Paediatric infectious disease & immunisation < PAEDIATRICS                                                                                                                                                                                                                                         |
|                                 |                                                                                                                                                                                                                                                                                                                                                                               |

SCHOLARONE™  
Manuscripts

1  
2  
3 **Vaccine hesitancy from parents and healthcare providers perspectives in Hadhramout**  
4 **governorate, Yemen: a mixed-methods study protocol**  
5  
6  
7

8 Rosnah Sutan<sup>1</sup>, Suha Ali Batarfi<sup>1,2</sup>, Halim Ismail<sup>1</sup>, Abdulla Salem Bin-Ghouth<sup>2</sup>  
9

10 <sup>1</sup>Community Health Department, Medical Faculty, University Kebangsaan Malaysia  
11

12 <sup>2</sup> Department of Community Medicine, Hadhramout University College of Medicine and Health  
13 Sciences (HUCOM), Yemen  
14  
15

16  
17  
18 **Correspondence author:**  
19

20 Suha Ali Batarfi  
21

22 Department of Community Medicine, Hadhramout University College of Medicine (HUCOM),  
23 Yemen  
24  
25

26 Email: batarfisuhaali@gmail.com  
27

28 Phone:+6011-27107155  
29  
30

31  
32  
33 Word Count (Abstract): 244  
34

35 Word Count: 3358  
36  
37

38 Number of figures and tables: 2 figures, 3 tables  
39  
40  
41  
42  
43  
44  
45  
46  
47  
48  
49  
50  
51  
52  
53  
54  
55  
56  
57  
58  
59  
60

## ABSTRACT

**Introduction:** Although immunisation prevents the death of millions of infants and children each year, the vaccination coverage of routine childhood vaccination does not reach its target. The reasons for low vaccination uptake can be related to both demand and supply side determinants. The prevalence of vaccine hesitancy is increasing globally. However, data on vaccine hesitancy in low-income Arabic countries are scarce. To investigate this issue in Yemen, an Arabic low-income country, we aim to examine the link between vaccine hesitancy and the immunisation status of children living in Costal Hadhramout, Yemen, from the perspective of their parents and healthcare providers.

**Methods and analysis:** We will use a mixed-method research design. The study will be conducted in Costal Hadhramout in three phases. Phase 1 will involve a situational analysis using secondary data from records of the national expanded immunisation program in Costal Hadhramout to examine the trend for previous years. Phase 2 will be a quantitative study aimed at assessing the prevalence of vaccination status of children aged <2 years and the determinants of parental vaccine hesitancy perception through a validated questionnaire. Lastly, Phase 3 will be a qualitative study that explores vaccine hesitancy in Yemen using in-depth interviews and focus group discussions with parents and healthcare providers, respectively.

**Ethics and dissemination:** The study has been approved by the Research Committee of the Faculty of Medicine, University Kebangsaan Malaysia. The findings will be disseminated via publication in peer-reviewed academic journals, academic conferences and public presentations.

### STRENGTH AND LIMITATIONS OF THIS STUDY

- The strength of the present study protocol is its ability to determine all aspects of child, parental and healthcare factors of vaccine hesitancy among the Yemeni.
- Using national data will aid generalisation of the findings to Yemen.
- Using mixed methods has the advantage of improving the grey area of socio-perspective, facilitators, and barriers.
- The validated questionnaire used will ensure better data quality.
- The inability to meet face to face during the current coronavirus disease 2019 (COVID-19) pandemic poses a limitation. Video or voice calls alone may not fully depict the respondent's expression and validity of the data captured.

## INTRODUCTION

During the 20th century, there was a significant increase in life expectancy, attributed mainly to improvements in child survival. Universal child immunisation has been an effective preventive measure for protecting the vulnerable group. Immunisation has prevented millions of deaths related to vaccine-preventable diseases (VPDs) around the world<sup>1</sup>. From 2007 to 2010, global third dose diphtheria, tetanus and pertussis (DTP3) coverage increased from 79% to 84% but has been plateauing since 2010. DTP3 coverage varies by region, being only 72% in the World Health Organization (WHO) African Region while it is 97% in the WHO Western Pacific Region<sup>2</sup>.

The reasons for low vaccination uptake are often not completely understood and appear to be multifactorial. Inadequate vaccination coverage can be related to both demand and supply side determinants. Most of the reasons for the low uptake of childhood vaccination in developing countries are related to lack of access to vaccination and family factors. Low education, literacy and socioeconomic status are well-known indirect contributors to coverage not being achieved. However, in several developing countries, the weakness of the health system is considered a significant barrier<sup>3 4</sup>. Persistent challenges seen related to acceptance of the services that affect vaccine uptake, especially in developing countries<sup>5,6</sup>.

Vaccine hesitancy is a behavioural phenomenon among both those who accept all vaccines without hesitation and those refuse all vaccines<sup>7,8</sup>. Vaccine hesitancy has been recognised as a growing problem of global importance that affects both developing and developed countries. The WHO has defined it as a delay in acceptance or refusal of vaccines despite the availability of vaccine services<sup>9</sup>. Recently, vaccine hesitancy prevalence has emerged as a global problem and is evident in poor childhood vaccination coverage. The WHO has identified it as a priority issue and has developed a vaccine hesitancy model framework that emphasises confidence, complacency and convenience<sup>9</sup>. The framework was expanded to include confidence, complacency, constraints, risk calculation and collective responsibility. These factors were identified as the psychological antecedents of vaccination<sup>10</sup>. These models have been suggested based on research predominantly conducted in well-developed and high-income countries<sup>11</sup>. Studies in neighbouring Arab countries have addressed parental vaccine hesitancy as a concerning problem that likely influences the uptake of childhood vaccination<sup>12,13</sup>. However, to the best of our knowledge, no published study to date has addressed vaccine hesitancy in Yemen.



## Yemen's Issues and Challenges Regarding Child Immunisation

Yemen is a low-income Arabic country with poor socioeconomic status and a fragile health system. It has a hard geographic environment, which affects access to essential basic services, and limited financial support for covering costs presents a major challenge<sup>14</sup>. Since March 2015, Yemen had been engaged in civil war, which has continued to date. Civil war and internal conflict affect local development in Yemen<sup>15,16</sup>. The instability, shortage of services and internal displacement may lead to limited vaccination coverage<sup>17</sup>. The Expanded Program of Immunisation (EPI) in Yemen was initiated in 1979 as a part of the Primary Health Care General Directorate in Public Health and Population. It is aimed at preventing morbidity and mortality from Vaccine Preventable Diseases (VPDs). The target groups are infants, and women of child-bearing age<sup>18</sup>. Routine immunisation services in Yemen are provided through fixed vaccination posts within health facilities and outreach vaccination strategies and are based on the proximity of the target populations to the health facility. Table 1 shows the standard schedule of routine immunisation of children in Yemen.

Table 1: Standard schedule of routine immunisation of children in the Republic of Yemen

| Vaccine                            | Age      |         |          |          |          |           |
|------------------------------------|----------|---------|----------|----------|----------|-----------|
|                                    | At birth | 6 weeks | 10 weeks | 14 weeks | 9 months | 18 months |
| <b>BCG*</b>                        | x        |         |          |          |          |           |
| <b>OPV*</b>                        | x        | x       | x        | x        | x        | x         |
| <b>Pentavalent (DPT,Hep B,Hib)</b> |          | x       | x        | x        |          |           |
| <b>Pneumococcal</b>                |          | x       | x        | x        |          |           |
| <b>Rotavirus</b>                   |          | x       | x        |          |          |           |
| <b>MR*</b>                         |          |         |          |          | x        | x         |
| <b>IPV*</b>                        |          |         |          | x        |          |           |

\*BCG: Bacillus Calmette-Guerin, OPV: oral polio vaccine, DPT: Diphtheria, Tetanus and Pertussis, Hep B: Hepatitis B, Hib: Hemophilus influenzae type b, MR: measles and rubella, IPV: inactivated poliovirus vaccine

According to the last Yemen National Health and Demographic Survey, in 2013, only 42.6% of children aged 12–23 months were fully vaccinated, while 16% did not receive any vaccination. No reported published data are available for comparison on trend. However, vaccines for significant VPDs are publicly available for free<sup>19</sup>. The WHO and the United Nations

1  
2  
3 International Children's Emergency Fund (UNICEF) reported that the 2018 vaccination coverage  
4 for Yemen was 65% based on DTP3, which remains below the 90% every country has achieved  
5 by 2020<sup>20</sup>. From previous studies performed in Yemen, we may conclude that even before the  
6 war, vaccination coverage in Yemen had not been meeting an acceptable target, and the  
7 percentage of children who are completely unvaccinated has increased. In addition, various  
8 Governorates of Yemen have reported that children are unvaccinated or partially vaccinated  
9 mainly due to a lack of information and parental motivation<sup>18, 21-23</sup>.  
10  
11  
12  
13  
14  
15

### 16 **The Rationale for This Research**

17 Although vaccine hesitancy has been addressed extensively in the literature in the past few years,  
18 few studies have explored this issue in low-income countries. Thus, most findings and models  
19 developed are based on studies performed in high-income countries<sup>11</sup>. Limited studies have  
20 addressed the issue of childhood vaccination in Yemen, and most studies have focused on  
21 coverage and the reasons for non-vaccination<sup>17 18 22 23</sup>. Only one study has addressed the  
22 determinants of complete vaccination<sup>21</sup>, although it did not address the issue of vaccine hesitancy.  
23 Furthermore, all published studies addressing childhood vaccination in Yemen used a quantitative  
24 method, which cannot yield in-depth details on the problem when integrated with available  
25 qualitative study findings. In addition, all community-based studies performed in Yemen explored  
26 the problem from the parents' perspective only and did not consider that of the healthcare workers,  
27 who can provide a bigger picture of the problem.  
28  
29  
30  
31  
32  
33  
34

35 Studying the perspective of parents and healthcare workers on vaccine hesitancy  
36 regarding childhood vaccination is vital for improving service delivery and vaccine uptake. In  
37 addition, it aids the reduction of the high morbidity and mortality rate among children from VPDs,  
38 which are the leading cause of under-five mortality. Therefore, understanding their perceptions is  
39 crucial, as they play a vital role in vaccination programs. Furthermore, exploring their perspectives  
40 would be informative for understanding the barriers they face. Accordingly, to bridge the  
41 knowledge gap in the literature on vaccine hesitancy and childhood vaccination in Yemen, the  
42 present study is a mixed-method study for assessing the determinants of vaccine hesitancy from  
43 the perspective of parents and healthcare workers. A conceptual framework (Figure 1) illustrates  
44 the concept of the present study to bridge the evidence gap in the literature, which must be  
45 explored.  
46  
47  
48  
49  
50  
51  
52  
53  
54  
55  
56  
57  
58  
59  
60

## Aims and Objectives

This research aims to address the issue of vaccine hesitancy and child immunisation status among children living in Costal Hadhramout, Hadhramout Governorate, Yemen, from the perspective of parents and healthcare providers. The specific research objectives are:

1. To conduct a situational analysis of routine childhood immunisation EPI data in Costal Hadhramout.
2. To measure the prevalence of vaccine hesitancy and child immunisation status among children and their mothers living in Costal Hadhramout.
3. To identify the associated factors and predict the vaccine hesitancy and immunisation status of children living in Costal Hadhramout.
4. To explore mothers' reasons for hesitancy regarding childhood vaccination.
5. To explore the barriers healthcare providers face in achieving immunisation coverage in Costal Hadhramout.

## METHODS

A complementary explanatory sequential mixed-method study design is used. The study will take place in Hadhramout in Yemen, consisting of 30 districts and occupying vast areas of the Arabian Sea coast. Hadhramout is divided administratively into two parts: the valley/desert (Wadi Hadhramout) and the coast (Coastal Hadhramout). Coastal Hadhramout overlooks south to the Arabian Sea and has a coastline of approximately 120 km. The estimated total population of Coastal Hadhramout in 2018 was 893,502 people. The population grows at a rate of 3.08% annually. This research targets the 12 districts of Coastal Hadhramout: Al-Mukalla, rural Al-Mukalla, Gail Bawazeer, Al-Shahr, Al-Dees, Ridh and Gosaiar, Ghail bin Yumin, Doan, Al-dulaia, Yeabeth, Hajer and Broome-Mayfa'a<sup>24</sup>. This study will consist of three phases: (1) situation analysis, (2) quantitative study and (3) qualitative study. Figure 2 illustrates the overview of the study phases and their flow.

### Phase 1: Situation analysis

Phase 1 is a retrospective descriptive study. The records from the national immunisation program for the past 10 years (from January 2011 to December 2020) for the 12 Coastal Hadhramout districts will be reviewed and analysed (secondary data analysis). After permission has been obtained from the general manager of the Coastal Hadhramout Health and Population Affairs Office, data will be extracted from Coastal Hadhramout Health and Population Affairs Office Department of EPI data. First, we will assess the immunisation coverage rate (estimated for each vaccine, and for multi-dose vaccines, for each dose received (e.g., diphtheria-tetanus-pertussis-containing vaccine (DTPCV1, DTPCV2, DTPCV3) in each year (trend analysis, the first outcome of this phase). The districts will be classified into good or low coverage. The classification will be dependent on the Global Immunisation Vision and Strategy goal: at least 90% national vaccination coverage and at least 80% vaccination coverage in every district or equivalent administrative unit. Therefore, each district with  $\geq 80\%$  coverage will be classified as good coverage while any district with  $< 80\%$  coverage will be considered a low-coverage district. This classification is the second outcome of this phase and will be used for selecting districts in Phase 2. Phase 1 data collection and analysis began in August 2021 and ended in December 2021.

### Phase 2: Quantitative study

Phase 2 uses a community-based, cross-sectional study design. The study population is the mothers or caretakers of children aged  $< 2$  years in 2021 and living in Coastal Hadhramout. The study will use stratified cluster sampling, combining stratified and cluster sampling methods. First, the 12 Coastal Hadhramout districts will be stratified by immunisation coverage level, i.e. good or low as per Phase 1. Two districts will be selected randomly from each stratum. Second, a 30-household cluster (estimated by the researcher and may be more based on the absolute number of houses in each cluster) will be chosen from the selected districts proportionally to size. Then, all households in those clusters will be surveyed for an eligible child.

The researcher will prepare the sampling frame used in this study after consultation with the Coastal Hadhramout EPI director-general. Moreover, this sampling frame will be prepared based on the list of household distribution used in the last National Immunisation Days (NIDs). The clusters in each district will be identified based on this list (every cluster contains approximately 20–30 households). Then, the researcher will select the number of clusters required to cover the sample size in this study from each district proportionally. In this study, an eligible mother or caretaker refers to a mother with a child aged  $< 2$  years. The youngest child will

1  
2  
3 be taken for mothers with more than one child aged <2 years. We will exclude non-Yemeni  
4 families.  
5

6  
7 The sample size for this phase is calculated based on estimating proportion (prevalence)  
8 using the Kish formula<sup>25</sup> and comparing two proportions using the Fleiss formula<sup>26</sup> with a  
9 confidence interval of 95% and study power of 0.80. The largest sample size derived using both  
10 formulae was 767, so this will be the sample size for this phase. The researcher and research  
11 assistants (health workers) will collect data from the households in the selected clusters. Four  
12 health workers will be trained to collect data from the mothers. During fieldwork, each health  
13 worker will work in a team. Each team will be supervised in the field by the researcher or fieldwork  
14 supervisor. Respondents will be interviewed using a structured, pretested designed questionnaire  
15 related to vaccine hesitancy perception (VHP) after being informed of the purpose of the study  
16 and after agreeing to participate in the study.  
17  
18  
19  
20  
21  
22

23 The VHP questionnaire will be adopted from varies validated questionnaire and adapted  
24 to the Yemeni population. The VHP questionnaire will cover the following domains: Domain 1:  
25 Child-related characteristics, e.g. age, sex, birth order, place and type of delivery, gestational age  
26 at delivery and health status. Domain 2: Family-related characteristics, e.g. age, education, work,  
27 monthly income, residency and number of people living in the family. Domain 3: Immunisation-  
28 related knowledge. Domain 4: vaccine hesitancy. Domain 5: Psychological antecedents of  
29 vaccination (confidence, complacency, constraints, calculation, collective responsibility). Domain  
30 6: Vaccination status of the child (full, partial or unvaccinated) based on the child's immunisation  
31 card and history of immunisation provided by the mother. Domain 7: Availability and accessibility  
32 to vaccination service. Domain 8: Reasons for the child's incomplete vaccination or non-  
33 vaccination. Table 2 lists the operational definitions of the study variables.  
34  
35  
36  
37  
38  
39

40 In this study, the primary dependent variable is the mother's hesitancy level, which will be  
41 assessed using an Arabic version of the Parent Attitudes about Childhood Vaccines questionnaire  
42 (PACV) after granted permission from the author<sup>12 27</sup>. The PACV questionnaire is divided into  
43 three domains: behaviour, safety and efficacy, and general attitude and trust. Fifteen items are  
44 grouped under these domains. The PACV uses a numeric score, where items answered with a  
45 hesitant response are scored 2 points, items answered with a response of do not know or not  
46 sure are scored 1 point and items answered with a non-hesitant response are scored 0 points.  
47 The raw score is then converted to a score of 0–100. Accordingly, parents are assigned 1 to  
48 indicate a hesitant score  $\geq 50$  or 0 as a non-hesitant parent with a score  $< 50$ .  
49  
50  
51  
52  
53  
54  
55  
56  
57  
58  
59  
60

1  
2  
3 The second dependent variable in this study is the immunisation (vaccination) status of  
4 children aged 12–23 months. The immunisation status is classified as complete (Full), incomplete  
5 or unimmunised. These classifications are defined according to the Yemini EPI schedule:  
6 Complete (Full) immunisation: A child aged 12–23 months who has received one bacillus  
7 Calmette-Guerin (BCG) dose, at least three doses of pentavalent vaccine, at least three doses of  
8 pneumococcal vaccine, at least three doses of oral polio vaccine (OPV), two doses of rotavirus  
9 vaccine and one dose of MR (measles and rubella) vaccine. Incomplete immunisation: A child  
10 who has not received all routine EPI vaccines before their first birthday. Unimmunised  
11 (unvaccinated): A child who did not receive any of the 13 doses of the recommended vaccines<sup>22</sup>.  
12  
13  
14  
15  
16  
17

18 The independent variables in our study are the child and family characteristics: Age, sex,  
19 birth order, place and type of delivery, gestational age at delivery and health status of the child;  
20 parents' age, education, work, monthly income, residence and number of people living in the  
21 family. Immunisation-related knowledge: This variable will be assessed using a scale adapted  
22 from a previous study performed in Yemen<sup>21</sup>. Psychological antecedents of vaccination:  
23 Confidence, complacency, constraints, calculation and collective responsibility (5C scale). These  
24 variables will be measured using the 5C scale<sup>10</sup>. To the best of our knowledge, there is no Arabic  
25 version of the 5C scale. Therefore, according to the sample study protocol, the translation and  
26 validation of the 5C scale proposed by Betsch, et al.<sup>28</sup> will be used. Availability and accessibility  
27 of vaccination service will be assessed using four questions adapted from the literature<sup>21</sup>. After  
28 permission has been obtained from the author, all mentioned scales will be adapted to suit the  
29 local population.  
30  
31  
32  
33  
34  
35  
36

37 The validity and reliability of the VHP questionnaire will be assessed. The univariate  
38 analysis describes frequencies and percentages. The associations between dependent and  
39 independent variables will be assessed with bivariate analysis. A p-value of <0.05 will determine  
40 the significant variables. The effect of different variables on hesitancy and children's immunisation  
41 status will be assessed with multiple logistic regression. The results will be presented as tables  
42 and graphs. Data collection and analysis for this phase will begin in January 2022 and should end  
43 in May 2022.  
44  
45  
46  
47  
48  
49  
50

### 51 **Phase 3: Qualitative study**

52  
53 The case study will be conducted in Coastal Hadhramout. The study population is the  
54 mothers/caretakers who participated in Phase 2 and who were identified as hesitant mothers, and  
55  
56  
57  
58  
59  
60

1  
2  
3 the healthcare providers and health leaders involved in the immunisation program in Coastal  
4 Hadhramout. This phase will involve purposive sampling. Mothers/caretakers will be selected  
5 from among those who participated in Phase 2 and showed good cooperation. Healthcare  
6 providers and leaders will be selected from the health facilities that provide immunisation in the  
7 selected cluster areas in Phase 2.  
8  
9  
10

11 Data will be collected through in-depth interviews with the mothers/caretakers and from  
12 healthcare providers and health leaders via focus group discussions (FGD) (Table 3). The in-  
13 depth interviews and FGD will be performed until saturation is reached after triangulation. Then,  
14 thematic analysis will be performed to analyse the contents of in-depth interviews and FGD. Table  
15 3 lists the key questions. Data collection and analysis for this phase will begin in June 2022 and  
16 should end in October 2022.  
17  
18  
19  
20  
21

### 22 **Patient and Public Involvement**

23  
24 The participants, i.e. the parents and healthcare providers, will be involved in the study design  
25 mainly in Phase 2. In this phase, a research team will pilot and test the study tools, which would  
26 require contributions from the participants. Furthermore, in Phase 3, participants will have the  
27 opportunity to present any additional comments during the interview and FGD. Therefore, their  
28 priorities, experiences and perception can be taken into consideration.  
29  
30  
31

### 32 **ETHICS AND DISSEMINATION**

33  
34 The study proposal has been reviewed and approved by the Research Ethics Committee of the  
35 Faculty of Medicine, University Kebangsaan Malaysia (project code: FF-2021-051). Permission  
36 for conducting the research has been obtained from the Coastal Hadhramout health affairs office.  
37 The participants will receive a simple and clear explanation of the study's aim and procedure.  
38 Consent will be obtained from all participants. Personal safety risks to the participants or  
39 researchers involved in this study are not expected. The participants' privacy and confidentiality  
40 will be assured. The findings will be communicated through publication in peer-reviewed  
41 academic journals and disseminated to healthcare professionals, stakeholders, researchers and  
42 the public through academic conferences and public presentations.  
43  
44  
45  
46  
47  
48  
49  
50  
51  
52  
53  
54  
55  
56  
57  
58  
59  
60

Table 2 List of independent variables and their definitions in this study

| Independent variable                                                                                                    | Definition and analysis                                                                                                                                                                                                                                                                                                                                                                                                                                                                                                                                                                                                                                                                                                                 |
|-------------------------------------------------------------------------------------------------------------------------|-----------------------------------------------------------------------------------------------------------------------------------------------------------------------------------------------------------------------------------------------------------------------------------------------------------------------------------------------------------------------------------------------------------------------------------------------------------------------------------------------------------------------------------------------------------------------------------------------------------------------------------------------------------------------------------------------------------------------------------------|
| <b>I. Child-related variables</b>                                                                                       |                                                                                                                                                                                                                                                                                                                                                                                                                                                                                                                                                                                                                                                                                                                                         |
| Age                                                                                                                     | Age in months at data collection obtained from the child's birth certificate, immunisation card or by asking the mother/caretaker. The mean and SD will be calculated.                                                                                                                                                                                                                                                                                                                                                                                                                                                                                                                                                                  |
| Sex                                                                                                                     | Male or female.                                                                                                                                                                                                                                                                                                                                                                                                                                                                                                                                                                                                                                                                                                                         |
| Birth order                                                                                                             | The child's position among their siblings. Categorized as firstborn, 2–3, 4–5 and $\geq 6$ <sup>29</sup> .                                                                                                                                                                                                                                                                                                                                                                                                                                                                                                                                                                                                                              |
| Place of delivery                                                                                                       | At a health facility or at home <sup>29 30</sup> .                                                                                                                                                                                                                                                                                                                                                                                                                                                                                                                                                                                                                                                                                      |
| Type of delivery                                                                                                        | Vaginal or caesarean <sup>21</sup> .                                                                                                                                                                                                                                                                                                                                                                                                                                                                                                                                                                                                                                                                                                    |
| Gestational age at delivery                                                                                             | Full-term or premature.                                                                                                                                                                                                                                                                                                                                                                                                                                                                                                                                                                                                                                                                                                                 |
| Health status                                                                                                           | Well or has a medical problem.                                                                                                                                                                                                                                                                                                                                                                                                                                                                                                                                                                                                                                                                                                          |
| <b>ii. Family-related variables</b>                                                                                     |                                                                                                                                                                                                                                                                                                                                                                                                                                                                                                                                                                                                                                                                                                                                         |
| Mother's age (years)                                                                                                    | Age in years at data collection. The mean and SD will be calculated.                                                                                                                                                                                                                                                                                                                                                                                                                                                                                                                                                                                                                                                                    |
| Age at first birth (years)                                                                                              | Mother's age when she birthed her first child. The mean and SD will be calculated.                                                                                                                                                                                                                                                                                                                                                                                                                                                                                                                                                                                                                                                      |
| Mother's marital status                                                                                                 | Married or unmarried (divorced or widowed) <sup>21</sup> .                                                                                                                                                                                                                                                                                                                                                                                                                                                                                                                                                                                                                                                                              |
| Mother's education level                                                                                                | The highest formal education gained. Categorized as illiterate, able to read and write, essential education, secondary education or university and above <sup>31</sup> .                                                                                                                                                                                                                                                                                                                                                                                                                                                                                                                                                                |
| Mother's occupation                                                                                                     | Employed or homemaker <sup>32</sup> .                                                                                                                                                                                                                                                                                                                                                                                                                                                                                                                                                                                                                                                                                                   |
| Father's education level                                                                                                | The highest formal education gained. Categorized as illiterate, able to read and write, essential education, secondary education or university and above.                                                                                                                                                                                                                                                                                                                                                                                                                                                                                                                                                                               |
| Father's occupation                                                                                                     | Government employee, daily labourer, merchant, unemployed or other.                                                                                                                                                                                                                                                                                                                                                                                                                                                                                                                                                                                                                                                                     |
| Family size                                                                                                             | The total number of persons living in the household <sup>33</sup> .                                                                                                                                                                                                                                                                                                                                                                                                                                                                                                                                                                                                                                                                     |
| Family residency                                                                                                        | Permanent place of residence of the child's family. Categorized as urban or rural <sup>21 34</sup> .                                                                                                                                                                                                                                                                                                                                                                                                                                                                                                                                                                                                                                    |
| Monthly family income                                                                                                   | Average total income per month in Yemeni riyals (YR). The mean and SD will be calculated.                                                                                                                                                                                                                                                                                                                                                                                                                                                                                                                                                                                                                                               |
| <b>III. Mother/caretaker's immunisation-related knowledge</b>                                                           |                                                                                                                                                                                                                                                                                                                                                                                                                                                                                                                                                                                                                                                                                                                                         |
| Source of information                                                                                                   | The source from which the participant learns about vaccination and VPD. Categorized as 0 = Radio, 1 = TV, 2 = internet, 3 = friends, 4 = schools, 5 = health personnel, 6 = other.                                                                                                                                                                                                                                                                                                                                                                                                                                                                                                                                                      |
| Immunisation-related knowledge                                                                                          | The mother's knowledge on VPDs, the best means of protection against VPDs, the causes of VPDs, number of vaccine doses, and the time of vaccine administration was assessed through five groups of questions containing 38 items. Each item was scored as 1 = correct, 0 = wrong, or 0=Don't know the answer. The scale is adapted from a previous study performed in Yemen after permission has been obtained from the author <sup>21</sup> .<br>Analysis: The total knowledge score is calculated by summing the participant's responses. The median of the summative calculation score will be used. We classify it as 0 = poor knowledge (less than the median score) or 1 = good knowledge (equal and more than the median score). |
| <b>V. Physiological antecedents of vaccination. These variables will be measured by using the 5C scale<sup>10</sup></b> |                                                                                                                                                                                                                                                                                                                                                                                                                                                                                                                                                                                                                                                                                                                                         |
| Confidence                                                                                                              | Assessed via three items from the 5C scale: 1) I am completely confident that vaccines are safe. 2) Vaccinations are effective. 3) Regarding vaccines, I am confident that public authorities decide in the best interest of the community. Each item is scored on a 7-point Likert scale (1 = strongly disagree, 2 = moderately disagree, 3 = slightly disagree, 4 = neutral (neither disagree nor agree), 5 = slightly agree, 6 = moderately agree, 7 = strongly agree).<br>Analysis: The mean score will be calculated by summing the participant's responses for the three items and dividing it by 3 <sup>10</sup> .                                                                                                               |



|                                          |                                                                                                                                                                                                                                                                                                                                                                                                                                                                                                                                                                |
|------------------------------------------|----------------------------------------------------------------------------------------------------------------------------------------------------------------------------------------------------------------------------------------------------------------------------------------------------------------------------------------------------------------------------------------------------------------------------------------------------------------------------------------------------------------------------------------------------------------|
| Complacency                              | Assessed via three items from the 5C scale: 1) Vaccination is unnecessary because VPDs are not common anymore. 2) My immune system is strong, and it also protects me against diseases. 3) VPDs are not so severe that I should be vaccinated.<br>Each item is scored on a 7-point Likert scale as described for the confidence variable.<br>Analysis: The mean score will be calculated by summing the participant's responses to the three items and dividing it by 3 <sup>10</sup> .                                                                        |
| Constraints                              | Assessed via three items from the 5C scale: 1) Everyday stress prevents me from being vaccinated. 2) For me, it is inconvenient to be vaccinated. 3) Visiting the doctor makes me feel uncomfortable; this keeps me from being vaccinated.<br>Each item is scored on a 7-point Likert scale as described for the confidence variable.<br>Analysis: The mean score will be calculated by summing the participant's responses to the three items and dividing it by 3 <sup>10</sup> .                                                                            |
| Calculation                              | Assessed via three items from the 5C scale: 1) When I think about being vaccinated, I weigh its benefits and risks to make the best decision possible. 2) For every vaccination, I closely consider whether it is useful for me. 3) I need to understand the topic of vaccination before I get vaccinated fully.<br>Each item is scored on a 7-point Likert scale same as described for the confidence variable.<br>Analysis: The mean score will be calculated by summing the participant's responses to the three items and dividing it by 3 <sup>10</sup> . |
| Collective responsibility                | Assessed via three items from the 5C scale: 1) When everyone else is vaccinated, I do not have to be vaccinated too. 2) I get vaccinated because I can also protect people with a weaker immune system. 3) Vaccination is a collective action to prevent the spread of diseases.<br>Each item is scored on a 7-point Likert scale as described for the confidence variable.<br>Analysis: The mean score will be calculated by summing the participant's responses to the three items and dividing it by 3 <sup>10</sup> .                                      |
| <b>VI. Access to vaccination service</b> |                                                                                                                                                                                                                                                                                                                                                                                                                                                                                                                                                                |
| Distance                                 | The time taken to reach the nearest health facility. Categorized as 0 = ≤30 min, 1 = >30 min.                                                                                                                                                                                                                                                                                                                                                                                                                                                                  |
| Means of accessing the health facility   | Refers to how parents can arrive at the health facility, i.e. either by walking or using transport.                                                                                                                                                                                                                                                                                                                                                                                                                                                            |
| Availability of vaccine or vaccinator    | Refers to whether the vaccines and vaccinator are available at the health facility.                                                                                                                                                                                                                                                                                                                                                                                                                                                                            |
| Waiting time                             | Refers to the parents waiting for a long time before their child can be vaccinated.                                                                                                                                                                                                                                                                                                                                                                                                                                                                            |

Table 3: Critical questions for the qualitative phase

| <b>A. The key question for the in-depth interview with the mothers</b>                                                                                                                                                                  | <b>B. The critical question for the FGD with the healthcare providers and leaders</b>                                                                                                                                                           |
|-----------------------------------------------------------------------------------------------------------------------------------------------------------------------------------------------------------------------------------------|-------------------------------------------------------------------------------------------------------------------------------------------------------------------------------------------------------------------------------------------------|
| Why do parents refuse or not complete vaccination for their children?<br>- Socioeconomic reasons<br>- Cultural and religious reasons<br>- Parental vaccination knowledge reasons<br>- Service access reasons<br>- Staff-related reasons | What are the barriers to achieving immunisation coverage?<br>- Staff knowledge barriers<br>- Staff communication skill barriers<br>- Staff training and competency barriers<br>- Staff numbers barriers<br>- Supply and infrastructure barriers |

**Figure legend/caption:**

Figure 1: Conceptual Framework

Figure2: An overview of the study phases

**Author Contributions**

Batarfi, Suha Ali: write the research protocol, conduct, and report of the work described in the article. Sutan, Rosnah: provide idea in research protocol planning, review critically information reporting of the work described in the article. Ismail, Halim: review critically information reporting of the work described in the article. Bin-Ghouth, Abdulla Salem: review critically information reporting of the work described in the article. Batarfi, Suha Ali and Sutan, Rosnah: responsible for the overall content as guarantor(s)

**Patient consent for publication** Not required.

**Funding** This research received no specific grant from any funding agency in public, commercial or not-for-profit sectors.

**Competing interests** None declared.

**Provenance and peer review** Not commissioned; externally peer-reviewed.

**Data sharing statement** No additional data available.

**ORCID iDs:**

Rosnah Sutan: <https://orcid.org/0000-0001-9956-4727>

Suha Ali Batarfi: <https://orcid.org/0000-0003-0060-5694>

**REFERENCES:**

1. World Health Organization. World Health Organization vaccination coverage cluster surveys: reference manual: Geneva: World Health Organization, 2018a.
2. VanderEnde K, Gacic-Dobo M, Diallo MS, et al. Global Routine Vaccination Coverage—2017. *Morbidity and Mortality Weekly Report* 2018;67(45):1261.
3. Smith LE, Amlot R, Weinman J, et al. A systematic review of factors affecting vaccine uptake in young children. *Vaccine* 2017;35(45):6059-69. doi: 10.1016/j.vaccine.2017.09.046
4. Larson HJ. The biggest pandemic risk? Viral misinformation. *Nature* 2018;562(7726):309-10.
5. Cooper S, Okeibunor JC, Wiyeh A, et al. Knowledge advances and gaps on the demand side of vaccination. *The Lancet Infectious Diseases* 2019;19(1):13-15.
6. World Health Organization. 2017 Assessment report of the global vaccine action plan: Strategic Advisory Group of Experts on Immunization. Geneva: World Health Organization., 2017.

- 1
- 2
- 3 7. Macdonald N. Vaccine hesitancy: Definition, scope and determinants. *Vaccine* 2015;32(34) doi:  
4 10.1016/j.vaccine.2015.04.036
- 5 8. Domek GJ, O'Leary ST, Bull S, et al. Measuring vaccine hesitancy: Field testing the WHO SAGE Working  
6 Group on Vaccine Hesitancy survey tool in Guatemala. *Vaccine* 2018;36(35):5273-81. doi:  
7 <https://doi.org/10.1016/j.vaccine.2018.07.046>
- 8 9. The SAGE Vaccine Hesitancy Working Group. Report of the SAGE working group on vaccine hesitancy.  
9 Geneva, Switzerland: World Health Organization, 2014.
- 10 10. Betsch C, Schmid P, Heinemeier D, et al. Beyond confidence: Development of a measure assessing  
11 the 5C psychological antecedents of vaccination. *PLoS One* 2018;13:e0208601. doi:  
12 10.1371/journal.pone.0208601
- 13 11. Cooper S, Betsch C, Sambala EZ, et al. Vaccine hesitancy—a potential threat to the achievements of  
14 vaccination programmes in Africa. *Human Vaccines Immunother* 2018;14(10):2355-57.
- 15 12. Alsuwaidi AR, Elbarazi I, Al-Hamad S, et al. Vaccine hesitancy and its determinants among Arab  
16 parents: a cross-sectional survey in the United Arab Emirates. *Human Vaccines Immunother*  
17 2020:1-7.
- 18 13. Alsubaie SS, Gosadi IM, Alsaadi BM, et al. Vaccine hesitancy among Saudi parents and its  
19 determinants. *Saudi Med J* 2019;40(12):1242-50.
- 20 14. El Bcheraoui C, Jumaan AO, Collison ML, et al. Health in Yemen: losing ground in war time.  
21 *Globalization and health* 2018;14(1):42.
- 22 15. Boley J, Kent E, Grassie S, et al. A conflict overlooked: Yemen in crisis, 2017.
- 23 16. OCHA-Yemen. 2019 Humanitarian needs overview: Yemen: United Nations Office for the  
24 Coordination of Humanitarian Affairs, 2018.
- 25 17. Torbosh A, Al Amad MA, Al Serouri A, et al. The Impact of War in Yemen on Immunization Coverage  
26 of Children Under One Year of Age: Descriptive Study. *JMIR public health surveillance*  
27 2019;5(4):e14461. doi: DOI: 10.2196/14461
- 28 18. Ba'amer A. Coverage of and barriers to routine child vaccination in Mukalla district, Hadramout  
29 governorate, Yemen. *EMHJ-Eastern Mediterranean Health Journal* 2010;16(2): 223-27.
- 30 19. Ministry of Public Health Population, Central Statistical Organization. Yemen national health and  
31 demographic survey 2013: MOPHP, CSO, PAPFAM, and ICF International Rockville, Maryland,  
32 USA, 2015.
- 33 20. Peck M, Gacic-Dobo M, Diallo MS, et al. Global routine vaccination coverage, 2018/Couverture de la  
34 vaccination systematique dans le monde, 2018. *Weekly Epidemiological Record*  
35 2019;94(43):498-505.
- 36 21. Basaleem HO, Al-Sakkaf KA, Shamsuddin K. Immunization coverage and its determinants among  
37 children 12-23 months of age in Aden, Yemen. *Saudi Med J* 2010;31(11):1221-6.
- 38 22. Al-Tarbi AM, Bin Ghout AS. Vaccination Coverage in Tarim District, Yemen, 2017 *American Journal of*  
39 *Epidemiology & Public Health* 2020;4(1):10-15.
- 40 23. Al-Rabeei NA, Dallak AM, Al-Fosail AA. Immunization coverage among children in Al-Taizyah district,  
41 Taiz governorate, Yemen. *Indian Journal of Community Health* 2014;26(4):343-48.
- 42 24. Health Affairs Office Hadhramout Governorate. The statistical report for the year 2018 of the health  
43 office in Hadhramaut Governorate . Yemen: Republic of Yemen Ministry of Health & Population :  
44 Health Affairs Office Hadhramout Governorate, 2018:26.
- 45 25. Kish L. Survey sampling. New York: John Wiley and Sons 1965.
- 46 26. Fleiss JL. Statistical Methods for Rates and Proportions. New York: John Wiley and Sons 1981.
- 47 27. Opel DJ, Taylor JA, Mangione-Smith R, et al. Validity and reliability of a survey to identify vaccine-  
48 hesitant parents. *Vaccine* 2011;29(38):6598-605. doi: 10.1016/j.vaccine.2011.06.115 [published  
49 Online First: 2011/07/19]
- 50
- 51
- 52
- 53
- 54
- 55
- 56
- 57
- 58
- 59
- 60

- 1  
2  
3 28. Betsch C, Habersaat KB, Deshevoi S, et al. Sample study protocol for adapting and translating the 5C  
4 scale to assess the psychological antecedents of vaccination. *BMJ Open* 2020;10(3):e034869.  
5  
6 29. Efendi F, Pradiptasiwi DR, Krisnana I, et al. Factors associated with complete immunizations coverage  
7 among Indonesian children aged 12–23 months. *Children and Youth Services Review*  
8 2020;108:104651. doi: <https://doi.org/10.1016/j.chilyouth.2019.104651>  
9  
10 30. Mbengue MAS, Sarr M, Faye A, et al. Determinants of complete immunization among senegalese  
11 children aged 12-23 months: evidence from the demographic and health survey. *Bmc Public*  
12 *Health* 2017;17:9. doi: 10.1186/s12889-017-4493-3  
13  
14 31. Asif AM, Akbar M, Tahir MR, et al. Role of Maternal Education and Vaccination Coverage: Evidence  
15 From Pakistan Demographic and Health Survey. *Asia-Pac J Public Health* 2019;31(8):679-88. doi:  
16 10.1177/1010539519889765  
17  
18 32. Jama AA. Determinants of Complete Immunization Coverage among Children Aged 11-24 Months in  
19 Somalia. *Int J Pediatr* 2020;2020:7. doi: 10.1155/2020/5827074  
20  
21 33. Herliana P, Douiri A. Determinants of immunisation coverage of children aged 12-59 months in  
22 Indonesia: a cross-sectional study. *BMJ Open* 2017;7(12):14. doi: 10.1136/bmjopen-2016-  
23 015790  
24  
25 34. Geweniger A, Abbas KM. Childhood vaccination coverage and equity impact in Ethiopia by  
26 socioeconomic, geographic, maternal, and child characteristics. *Vaccine* 2020;38(20):3627-38.  
27 doi: 10.1016/j.vaccine.2020.03.040  
28  
29  
30  
31  
32  
33  
34  
35  
36  
37  
38  
39  
40  
41  
42  
43  
44  
45  
46  
47  
48  
49  
50  
51  
52  
53  
54  
55  
56  
57  
58  
59  
60

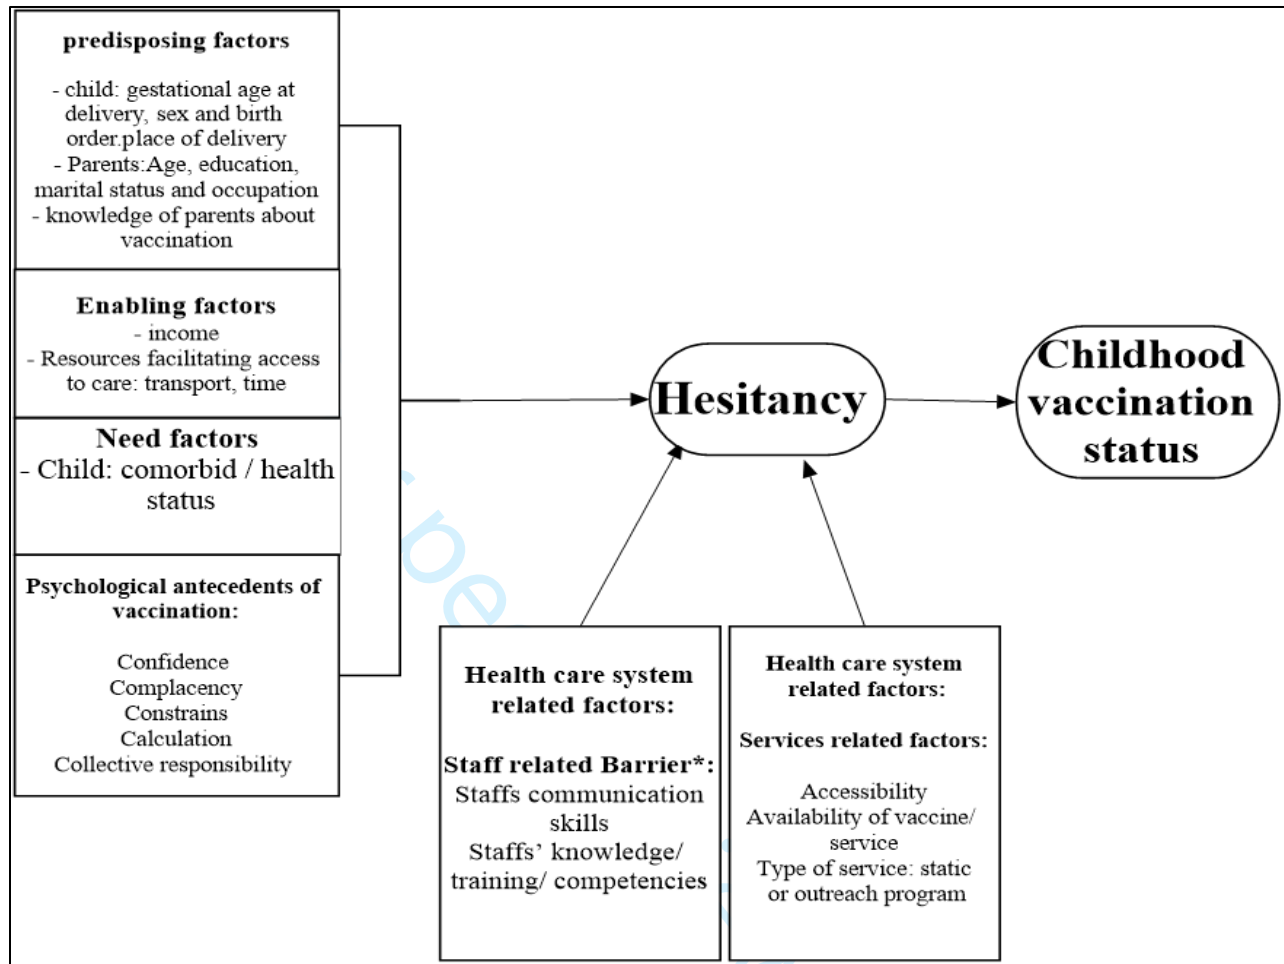

Figure 1: Conceptual Framework

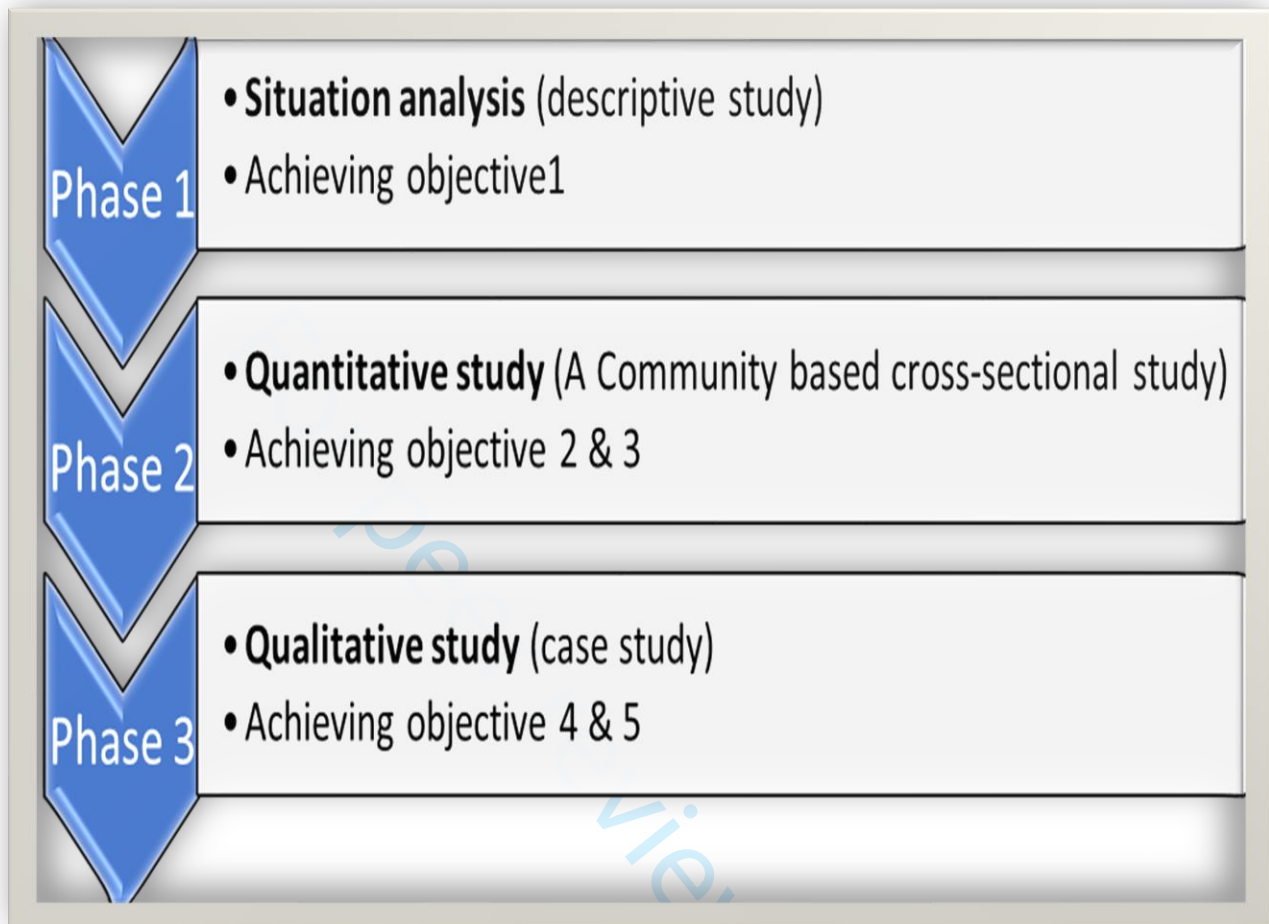

**Figure2: An Overview of the Study Phases**
